# Supplementary material
Source: ML conference proceedings conference paper supplement (https://proceedings.neurips.cc/paper_files/paper/2009/hash/fbd7939d674997cdb4692d34de8633c4-Abstract.html)
Supplement: Supplementary file 1 [file fbd7939d674997cdb4692d34de8633c4-Supplemental.zip]

Archive with 1 entries (1 files):
- extra/NIPS2009_0076_extra.pdf
